# Supplementary material for: Two dimethylphenyl imidazole dicarboxylate-based lanthanide metal–organic frameworks for luminescence sensing of benzaldehyde
Source: Royal Society of Chemistry journal article supplement (doi:10.1039/c4dt03326d), 2015-01-01
Supplement: c4dt03326d1.pdf [file c4dt03326d1.pdf]

## Two dimethylphenyl imidazole dicarboxylate-based lanthanide metal–organic frameworks for luminescence sensing of benzaldehyde

Bingbing Shi, Yuanhao Zhong, Li Guo and Gang Li\*

College of Chemistry and Molecular Engineering, Zhengzhou University, Zhengzhou 450001, Henan, P. R. China

### Supporting information

#### IR characterization

The IR spectra display characteristic absorption bands for carboxylate, imidazolyl units, phenyl units. Compounds **1** and **2** show absorption bands in the range of 3400-3500 cm<sup>-1</sup>, which may be attributed to  $\nu_{\text{N-H}}$  or  $\nu_{\text{O-H}}$  stretching frequencies of the imidazole ring or carboxylate group, respectively. The coordination of the carboxylate can be seen from the absorption bands in the frequency range 1381-1633 cm<sup>-1</sup> in **1** and **2** due to  $\nu_{\text{as}}(\text{COO}^-)$  and  $\nu_{\text{s}}(\text{COO}^-)$  vibrations respectively. The strong bands in the range of 2919-3154 cm<sup>-1</sup> and broad absorption bands in the range of 1633-1548 cm<sup>-1</sup> in complexes **1** and **2** imply the C=N and C=C stretching bands of imidazole ring in H3DMPhIDC. The characteristic IR band of the phenyl ring at 733-879 cm<sup>-1</sup> is due to  $\delta=\text{C-H}$  vibrations. In conclusion, the infrared spectral data of the complexes **1** and **2** are consistent with crystal structure analysis.

---

College of Chemistry and Molecular Engineering, Zhengzhou University, Zhengzhou 450001, Henan, P. R. China.  
E-mail: [gangli@zzu.edu.cn](mailto:gangli@zzu.edu.cn)

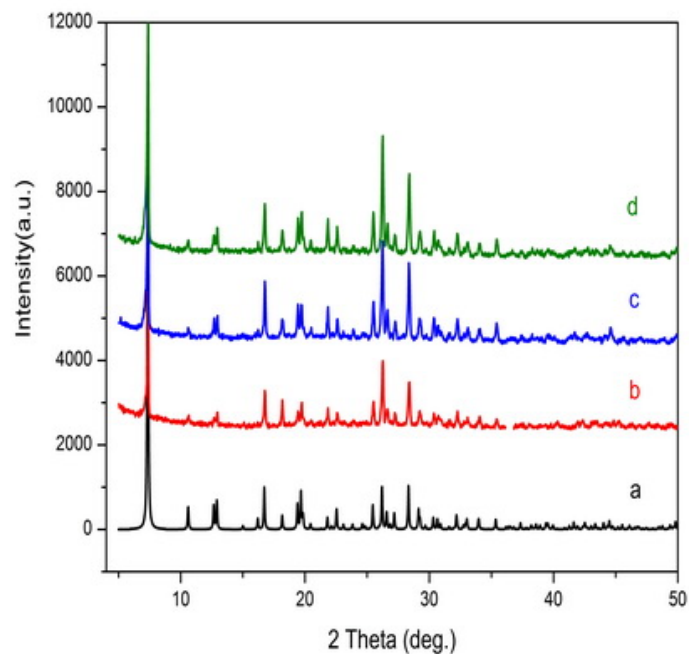

**Figure S1.** Powder X-ray diffraction patterns of (a) simulated from the crystal data of **1** (b) as-synthesized **1**, and the diffraction patterns of **1** obtained after the introduction of various solvents: (c) ethanol, (d) benzaldehyde.

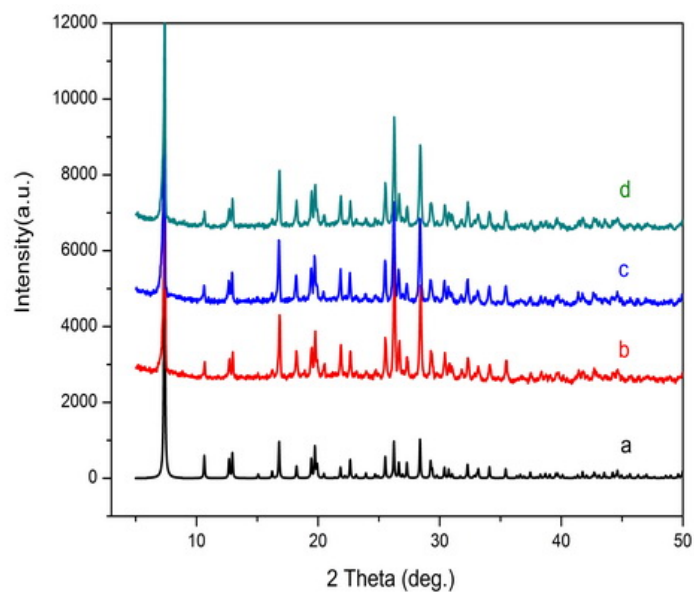

**Figure S2.** Powder X-ray diffraction patterns of (a) simulated from the crystal data of **2**. (b) as-synthesized **2**, and the diffraction patterns of **2** obtained after the introduction of various solvents: (c) ethanol, (d) benzaldehyde.

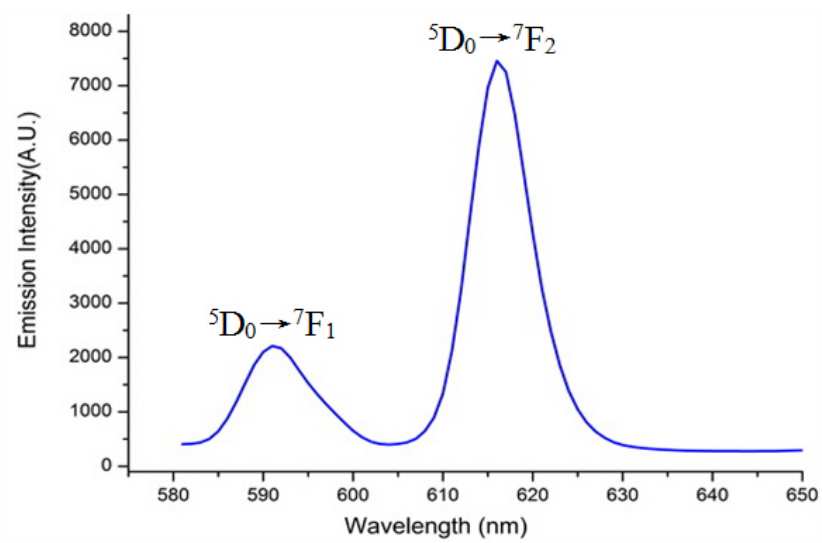

(a)

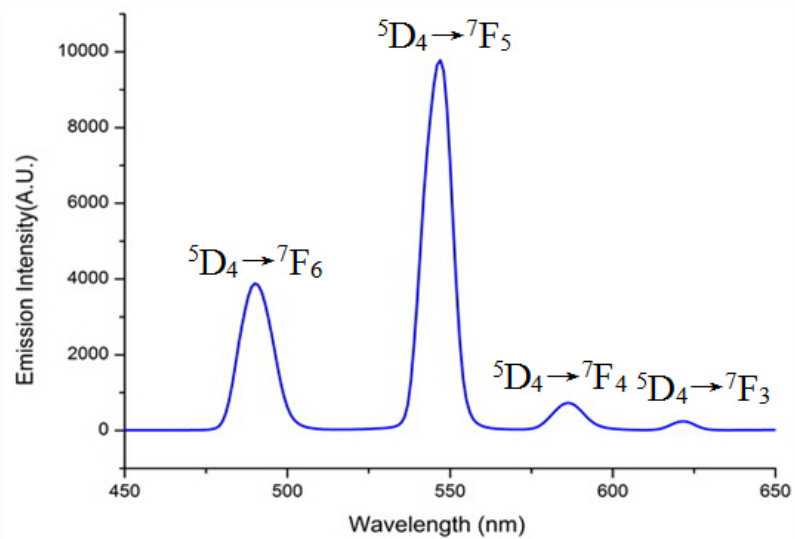

(b)

**Figure S3.** (a) Emission spectrum of **1** in solid state excited at 345 nm. (b) Emission spectrum of **2** in solid state excited at 332 nm.

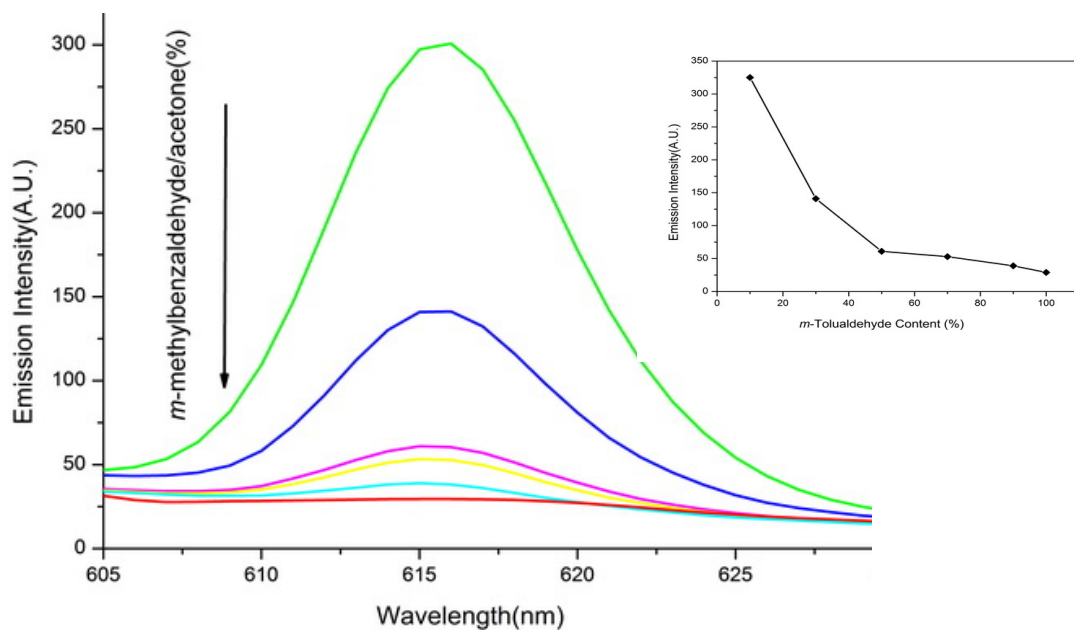

(a)

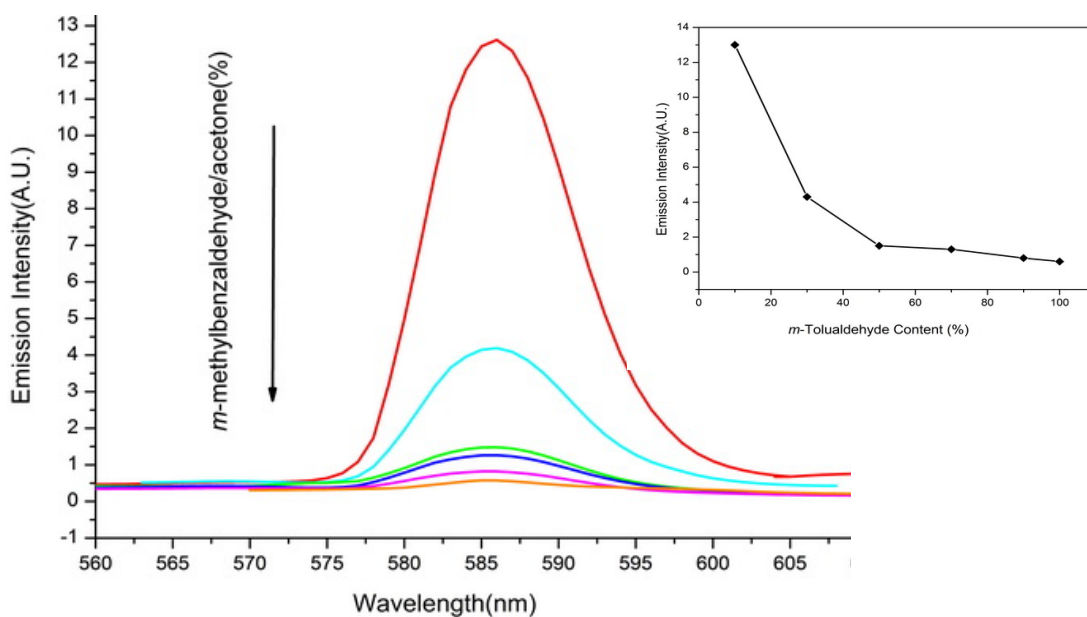

(b)

**Figure S4.** (a) Emissive response spectra of **1** for *m*-methylbenzaldehyde in acetone solution with different *m*-methylbenzaldehyde volume concentrations (insert is graph of the fluorescent intensity of **1** acetone as a function of *m*-methylbenzaldehyde content). (b) Emissive response spectra of **2** for *m*-methylbenzaldehyde in acetone solution with different *m*-methylbenzaldehyde volume concentrations (insert is graph of the fluorescent intensity of **2** acetone as a function of *m*-methylbenzaldehyde content).
